# Supplementary material
Source: PubMed Central journal article supplement (PMC2991480)
Supplement: NIHMS226012-supplement-01.pdf [file NIHMS226012-supplement-01.pdf]

## **Supplementary Material**

### **Independent component analysis: mining microarray data for fundamental human gene expression modules**

Jesse M. Engreitz<sup>1</sup>, Bernie J. Daigle, Jr.<sup>2</sup>, Jonathan J. Marshall<sup>1</sup>, Russ B. Altman<sup>1,2,\*</sup>

1 Department of Bioengineering, Stanford University, Stanford, CA 94305, USA

2 Department of Genetics, Stanford University School of Medicine, Stanford, CA 94305, USA

\* E-mail: russ.altman@stanford.edu

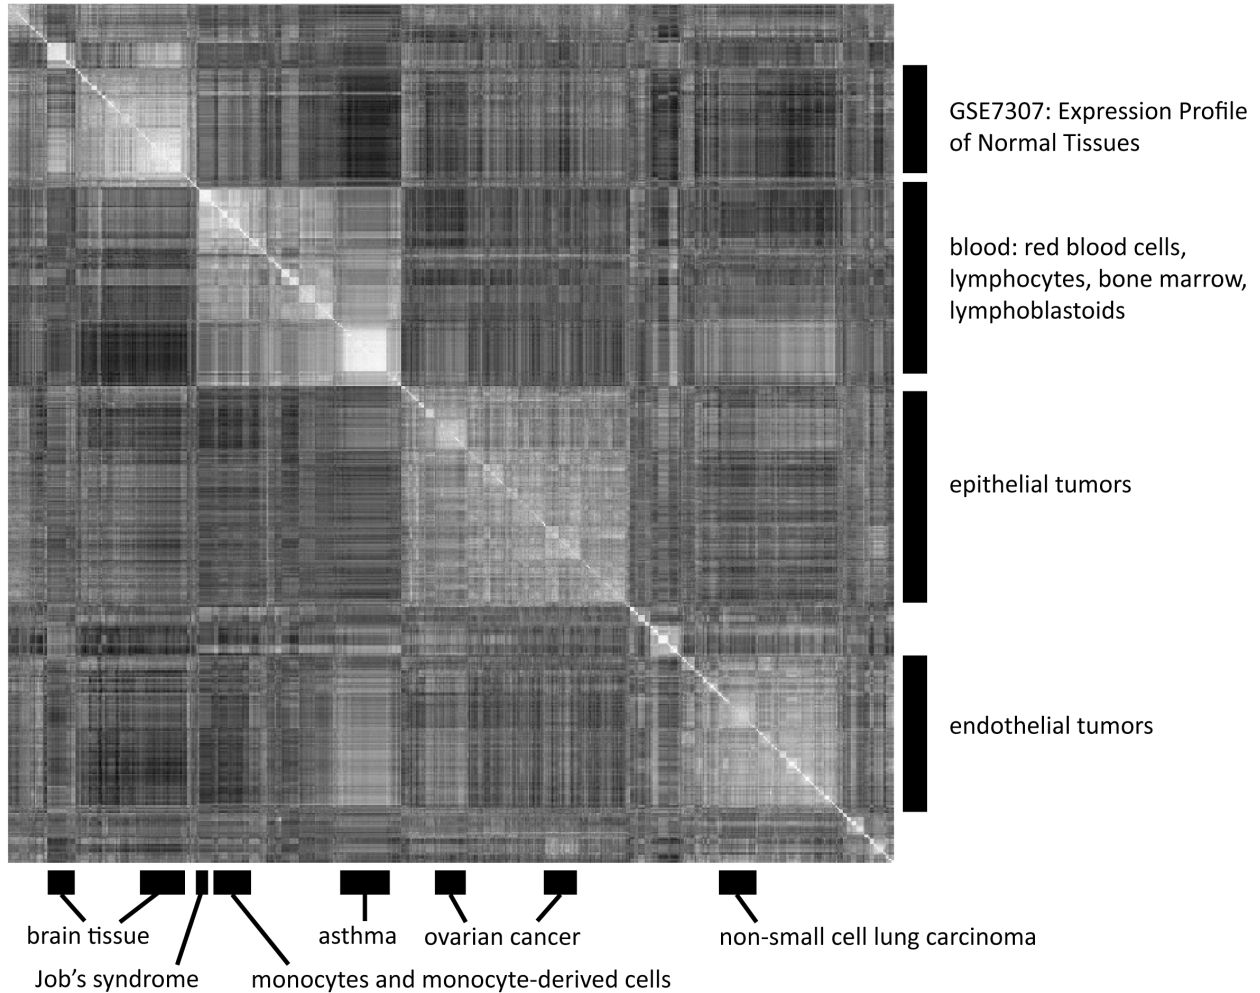

**Supplementary Figure 1.** Similarity matrix for 9,395-array compendium. The initial compendium contains large contributions from specific datasets, conditions, and cell types. A similarity metric based on Spearman's rank correlation shows large blocks of arrays that have similar signals (bright). These over-represented conditions may bias our module analysis, inflating the weights for components that describe these data sets.

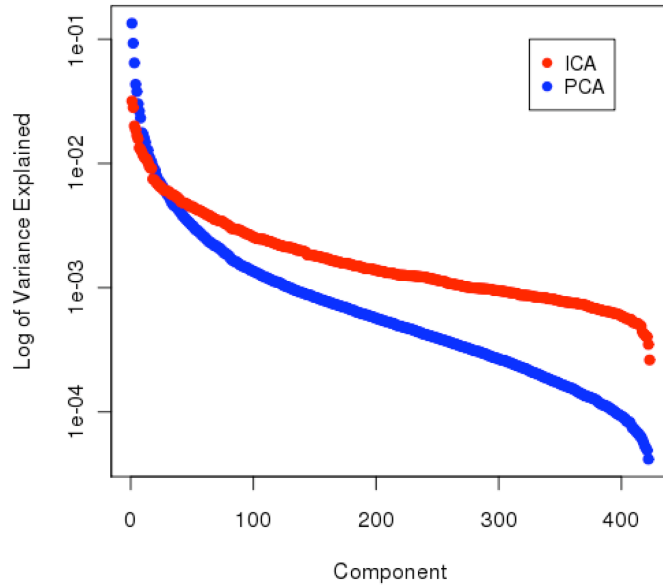

**Supplementary Figure 2.** Variance explained by independent and principal components. We applied ICA and PCA to the meta-compendium to find the maximum number of components possible (423). Components were ordered based on percentage variance of the meta-compendium explained. We plotted the variance of the meta-compendium explained by each component on a log scale to show the difference in the tails of the distribution. Principal component 1 explains 13.4% of the variance of the meta-compendium, while independent component 1 explains 3.2% of the variance.

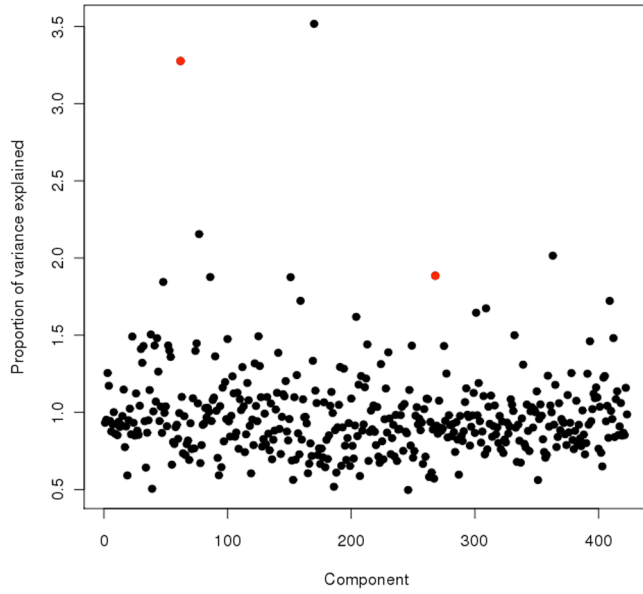

**Supplementary Figure 3.** Ratio of variance explained in the original compendium to variance explained in the meta-compendium for 423 fundamental components. A ratio greater than one indicates that a component explains more variance in the original than in the meta-compendium. Red dots represent fundamental components 62 and 268 (see Results 3.1).

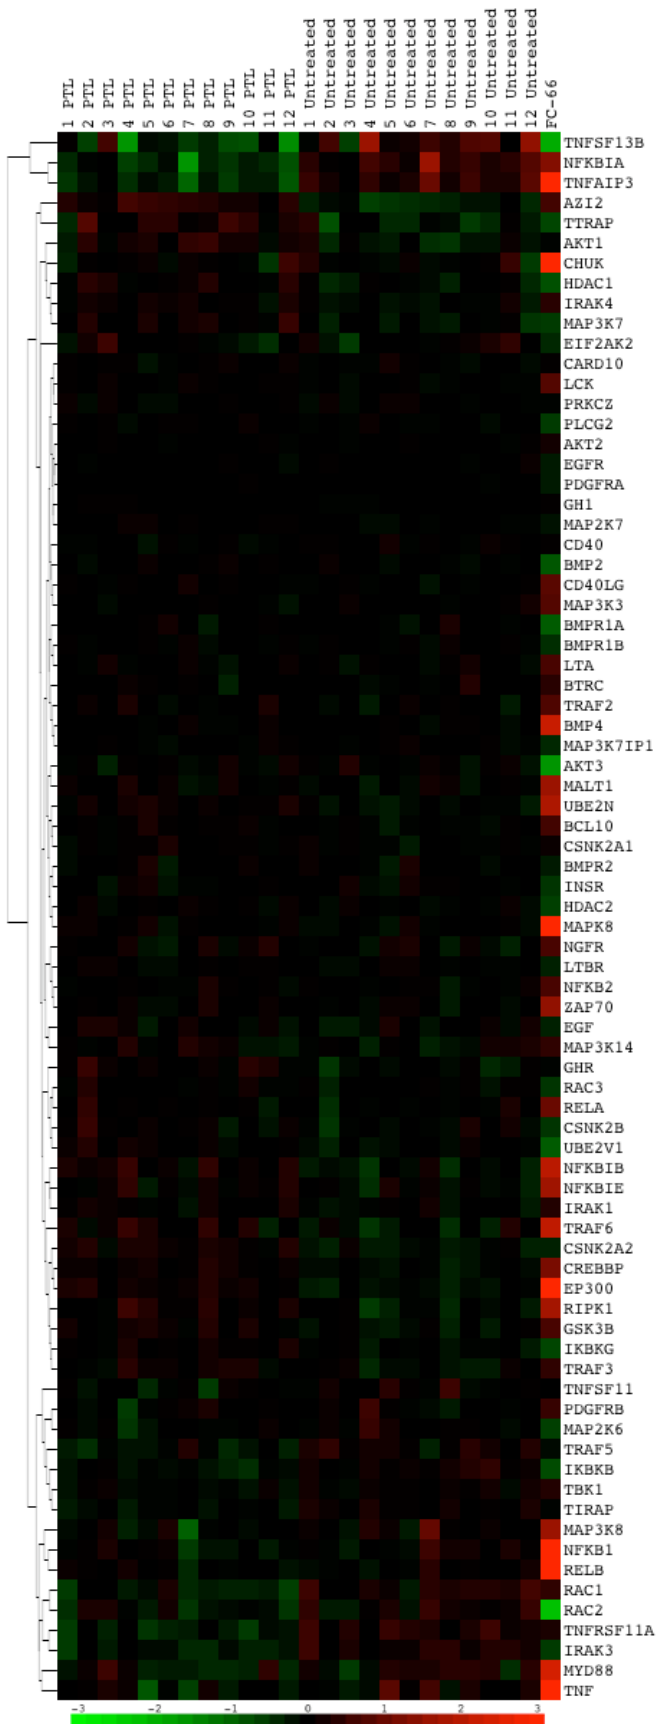

**Supplementary Figure 4.** Differential expression of genes in the NF-κB pathway in parthenolide-treated and untreated AML CD34<sup>+</sup> cells. We used the original data from GSE7538, applied RMA and *bias* normalizations as described in the text, and visualized the pair-centered expression of genes in the Ingenuity Canonical Pathway “NF-κB Signaling.” The right-most column shows the expression of each of these genes in fundamental component 66 (FC-66).

## Supplementary Table 1

Enriched GO categories for the ten fundamental components that explain the most variance in the meta-compendium.

| Component | GO Category                                            | Bonferroni p-value |
|-----------|--------------------------------------------------------|--------------------|
| 1         | immune response                                        | <1E-30             |
|           | inflammatory response                                  | 2.71E-06           |
|           | cellular defense response                              | 6.89E-05           |
|           | intracellular signaling cascade                        | 1.23E-04           |
|           | hemopoietic or lymphoid organ development              | 2.26E-04           |
|           | elevation of cytosolic calcium ion concentration       | 6.89E-04           |
|           | chemotaxis                                             | 1.13E-03           |
|           | apoptosis                                              | 1.48E-03           |
|           | T cell proliferation                                   | 1.97E-03           |
|           | defense response                                       | 3.74E-03           |
|           | cell surface receptor linked signal transduction       | 4.73E-03           |
|           | signal transduction                                    | 1.33E-02           |
|           | hemopoiesis                                            | 2.36E-02           |
|           | response to other organism                             | 4.38E-02           |
| 2         | cell division                                          | <1E-30             |
|           | mitosis                                                | <1E-30             |
|           | DNA replication                                        | 5.91E-20           |
|           | response to endogenous stimulus                        | 4.77E-13           |
|           | DNA replication initiation                             | 4.92E-13           |
|           | DNA repair                                             | 4.92E-13           |
|           | regulation of mitosis                                  | 3.30E-12           |
|           | spindle organization                                   | 4.43E-10           |
|           | interphase of mitotic cell cycle                       | 1.33E-08           |
|           | cell cycle process                                     | 1.48E-08           |
|           | mitotic sister chromatid segregation                   | 2.71E-08           |
|           | mitotic chromosome condensation                        | 1.57E-07           |
|           | regulation of cell cycle                               | 2.07E-07           |
|           | microtubule-based movement                             | 1.38E-06           |
|           | regulation of cyclin-dependent protein kinase activity | 3.64E-06           |
|           | cell cycle                                             | 4.48E-06           |
|           | mitotic spindle organization                           | 9.35E-06           |
|           | establishment of chromosome localization               | 2.41E-05           |
|           | phosphoinositide-mediated signaling                    | 3.10E-05           |
|           | DNA integrity checkpoint                               | 5.91E-05           |
|           | positive regulation of mitosis                         | 4.87E-04           |
|           | cell proliferation                                     | 5.41E-04           |
|           | chromosome segregation                                 | 5.91E-04           |
|           | cytokinesis                                            | 6.40E-04           |
|           | meiotic cell cycle                                     | 2.66E-03           |
|           | DNA unwinding during replication                       | 2.95E-03           |
|           | regulation of DNA metabolic process                    | 4.87E-03           |
|           | DNA recombination                                      | 5.41E-03           |
|           | mitotic cell cycle checkpoint                          | 5.91E-03           |
|           | mitotic cell cycle spindle assembly checkpoint         | 8.86E-03           |
|           | traversing start control point of mitotic cell cycle   | 8.86E-03           |
|           | cell cycle checkpoint                                  | 2.36E-02           |

|          |                                                         |          |
|----------|---------------------------------------------------------|----------|
|          | meiosis                                                 | 2.51E-02 |
|          | M phase of meiotic cell cycle                           | 2.51E-02 |
|          | DNA-dependent DNA replication                           | 4.23E-02 |
| <b>3</b> | cell adhesion                                           | 2.36E-23 |
|          | phosphate transport                                     | 3.99E-16 |
|          | skeletal system development                             | 3.59E-06 |
|          | cell surface receptor linked signal transduction        | 4.63E-05 |
|          | organ development                                       | 1.92E-04 |
|          | extracellular matrix organization                       | 1.43E-03 |
|          | response to wounding                                    | 1.48E-03 |
|          | organ morphogenesis                                     | 3.54E-03 |
|          | bioluminescence                                         | 2.02E-02 |
|          | enzyme linked receptor protein signaling pathway        | 2.22E-02 |
|          | transmembrane receptor protein tyrosine kinase activity | 2.31E-02 |
|          | blood vessel development                                | 4.33E-02 |
|          | vasculature development                                 | 4.92E-02 |
| <b>4</b> | epidermis development                                   | 5.42E-07 |
|          | cell adhesion                                           | 1.92E-05 |
| <b>5</b> | immune response                                         | 5.91E-27 |
|          | inflammatory response                                   | 9.35E-19 |
|          | antigen processing and presentation of peptide antigen  | 3.59E-10 |
|          | multicellular organismal process                        | 1.82E-05 |
|          | detection of biotic stimulus                            | 2.02E-05 |
|          | antimicrobial humoral response                          | 4.09E-05 |
|          | regulation of cytokine production                       | 8.37E-05 |
|          | signal transduction                                     | 3.00E-04 |
|          | response to other organism                              | 5.91E-04 |
|          | innate immune response                                  | 1.08E-03 |
|          | cellular defense response                               | 3.54E-03 |
|          | regulation of response to stimulus                      | 4.23E-03 |
|          | positive regulation of immune system process            | 8.37E-03 |
|          | leukocyte activation                                    | 1.18E-02 |
|          | regulation of immune response                           | 1.33E-02 |
|          | response to bacterium                                   | 1.72E-02 |
|          | Toll signaling pathway                                  | 3.15E-02 |
|          | interleukin-1 secretion                                 | 3.84E-02 |
|          | interleukin-1 beta secretion                            | 3.84E-02 |
|          | cytokine secretion                                      | 3.94E-02 |
|          | cell activation                                         | 4.28E-02 |
| <b>6</b> | cell differentiation                                    | 1.18E-04 |
|          | regulation of cell proliferation                        | 1.92E-04 |
|          | regulation of biological quality                        | 2.61E-04 |
|          | anatomical structure morphogenesis                      | 4.33E-04 |
|          | cell adhesion                                           | 2.02E-03 |
|          | wound healing                                           | 3.54E-03 |
|          | negative regulation of biological process               | 3.59E-03 |
|          | blood vessel morphogenesis                              | 4.92E-03 |

|           |                                                                          |          |
|-----------|--------------------------------------------------------------------------|----------|
|           | blood coagulation                                                        | 1.77E-02 |
|           | system development                                                       | 1.92E-02 |
|           | coagulation                                                              | 2.41E-02 |
|           | regulation of body fluid levels                                          | 2.46E-02 |
|           | hemostasis                                                               | 2.95E-02 |
|           | angiogenesis                                                             | 4.09E-02 |
|           | negative regulation of cellular process                                  | 4.38E-02 |
| <b>7</b>  | multicellular organismal process                                         | 1.28E-04 |
|           | anatomical structure development                                         | 9.85E-03 |
|           | fat cell differentiation                                                 | 2.07E-02 |
|           | system development                                                       | 4.53E-02 |
| <b>8</b>  | immune response                                                          | 6.40E-09 |
|           | antimicrobial humoral response                                           | 7.38E-06 |
|           | positive regulation of translation                                       | 3.50E-05 |
|           | regulation of lymphocyte proliferation                                   | 5.42E-04 |
|           | adaptive immune response based on somatic recombination of immune rec... | 7.38E-04 |
|           | alpha-beta T cell activation                                             | 8.86E-04 |
|           | B cell proliferation                                                     | 1.28E-03 |
|           | positive regulation of cytokine biosynthesis                             | 1.48E-03 |
|           | positive regulation of T cell activation                                 | 2.17E-03 |
|           | defense response                                                         | 3.00E-03 |
|           | regulation of T cell differentiation                                     | 3.64E-03 |
|           | regulation of B cell activation                                          | 8.86E-03 |
|           | T-helper cell differentiation                                            | 1.13E-02 |
|           | T cell differentiation during immune response                            | 1.13E-02 |
|           | alpha-beta T cell differentiation during immune response                 | 1.13E-02 |
|           | CD4-positive, alpha-beta T cell differentiation                          | 1.13E-02 |
|           | cell activation during immune response                                   | 1.13E-02 |
|           | lymphocyte activation during immune response                             | 1.13E-02 |
|           | T cell activation during immune response                                 | 1.13E-02 |
|           | leukocyte activation during immune response                              | 1.13E-02 |
|           | regulation of interferon-gamma biosynthesis                              | 1.38E-02 |
|           | interferon-gamma biosynthetic process                                    | 1.97E-02 |
|           | regulation of interferon-gamma production                                | 1.97E-02 |
|           | CD4-positive, alpha beta T cell differentiation during immune response   | 2.17E-02 |
|           | regulation of immune response                                            | 2.61E-02 |
|           | interferon-gamma production                                              | 2.76E-02 |
|           | regulation of apoptosis                                                  | 3.20E-02 |
|           | regulation of programmed cell death                                      | 3.89E-02 |
|           | regulation of protein localization                                       | 4.09E-02 |
|           | regulation of protein transport                                          | 4.09E-02 |
|           | regulation of establishment of protein localization                      | 4.09E-02 |
|           | cell communication                                                       | 4.92E-02 |
| <b>9</b>  | nucleobase, nucleoside, nucleotide and nucleic acid metabolic process    | 1.97E-02 |
| <b>10</b> | macromolecule metabolic process                                          | 1.18E-02 |
|           | primary metabolic process                                                | 3.45E-02 |



## Supplementary Table 2.

Enriched Ingenuity Canonical Pathways and GO categories for differentially expressed genes between PTL-treated and untreated AML CD34<sup>+</sup> cells.\*

| Annotation                                                       | P-Value  |
|------------------------------------------------------------------|----------|
| <b><i>Ingenuity Canonical Pathways (up-regulated)</i></b>        |          |
| Protein Ubiquitination Pathway                                   | 7.94E-14 |
| NRF2-mediated Oxidative Stress Response                          | 5.37E-10 |
| Hypoxia Signaling in the Cardiovascular System                   | 3.02E-08 |
| Polyamine Regulation in Colon Cancer                             | 3.02E-08 |
| Glucocorticoid Receptor Signaling                                | 2.45E-03 |
| Huntington's Disease Signaling                                   | 2.69E-03 |
| Endoplasmic Reticulum Stress Pathway                             | 2.69E-03 |
| Death Receptor Signaling                                         | 1.23E-02 |
| RAN Signaling                                                    | 1.23E-02 |
| Oxidative Phosphorylation                                        | 1.23E-02 |
| Glutamate Metabolism                                             | 1.55E-02 |
| Prostate Cancer Signaling                                        | 1.55E-02 |
| Molecular Mechanisms of Cancer                                   | 1.86E-02 |
| <b><i>GO Categories (up-regulated)</i></b>                       |          |
| organ development                                                | 4.87E-15 |
| multicellular organismal process                                 | 3.94E-09 |
| cell-cell signaling                                              | 1.18E-07 |
| system process                                                   | 3.00E-07 |
| signal transduction                                              | 1.38E-05 |
| immune response                                                  | 1.87E-05 |
| transmembrane receptor protein tyrosine kinase signaling pathway | 3.15E-05 |
| cell proliferation                                               | 3.30E-05 |
| multicellular organismal development                             | 1.97E-04 |
| cell development                                                 | 4.92E-04 |
| generation of precursor metabolites and energy                   | 1.43E-03 |
| positive regulation of cell proliferation                        | 3.05E-03 |
| inflammatory response                                            | 3.40E-03 |
| behavior                                                         | 7.38E-03 |
| response to chemical stimulus                                    | 1.28E-02 |
| phosphorylation                                                  | 1.38E-02 |
| cell cycle process                                               | 1.62E-02 |
| cell surface receptor linked signal transduction                 | 1.62E-02 |
| regulation of cell cycle                                         | 2.12E-02 |
| pattern specification process                                    | 2.36E-02 |
| hormone biosynthetic process                                     | 2.41E-02 |
| blood circulation                                                | 2.56E-02 |
| circulatory system process                                       | 2.56E-02 |
| skeletal system development                                      | 2.71E-02 |
| biological adhesion                                              | 3.40E-02 |
| cell adhesion                                                    | 3.40E-02 |
| <b><i>Ingenuity Canonical Pathways (down-regulated)</i></b>      |          |
| none                                                             |          |
| <b><i>GO Categories (down-regulated)</i></b>                     |          |
| generation of precursor metabolites and energy                   | 1.87E-10 |
| cell surface receptor linked signal transduction                 | 6.89E-09 |

|                                                         |          |
|---------------------------------------------------------|----------|
| blood circulation                                       | 2.51E-08 |
| regulation of multicellular organismal process          | 1.33E-07 |
| positive regulation of biological process               | 3.59E-07 |
| cellular calcium ion homeostasis                        | 3.69E-05 |
| organ morphogenesis                                     | 1.53E-04 |
| cellular alcohol metabolic process                      | 3.50E-04 |
| organ development                                       | 4.92E-04 |
| regulation of immune system process                     | 5.91E-04 |
| multicellular organismal process                        | 6.40E-04 |
| behavior                                                | 6.40E-04 |
| nucleotide biosynthetic process                         | 6.40E-04 |
| cell proliferation                                      | 6.89E-04 |
| cofactor metabolic process                              | 1.13E-03 |
| regulation of biological quality                        | 1.67E-03 |
| blood coagulation                                       | 3.59E-03 |
| myeloid cell differentiation                            | 4.53E-03 |
| inflammatory response                                   | 4.73E-03 |
| humoral immune response                                 | 4.87E-03 |
| synaptic transmission                                   | 5.91E-03 |
| activation of adenylate cyclase activity                | 9.85E-03 |
| carboxylic acid metabolic process                       | 1.33E-02 |
| positive regulation of cellular process                 | 1.33E-02 |
| negative regulation of biological process               | 1.43E-02 |
| organic acid metabolic process                          | 1.58E-02 |
| vascular process in circulatory system                  | 1.92E-02 |
| G-protein coupled receptor protein signaling            | 2.02E-02 |
| acute inflammatory response                             | 2.12E-02 |
| second-messenger-mediated signaling                     | 2.17E-02 |
| regulation of blood pressure                            | 2.17E-02 |
| response to stimulus                                    | 2.22E-02 |
| regulation of developmental process                     | 2.26E-02 |
| reproductive process in a multicellular organism        | 2.90E-02 |
| multicellular organism reproduction                     | 2.90E-02 |
| regulation of cell proliferation                        | 3.00E-02 |
| monohydric alcohol metabolic process                    | 3.15E-02 |
| ethanol metabolic process                               | 3.15E-02 |
| ethanol oxidation                                       | 3.15E-02 |
| skeletal system development                             | 3.50E-02 |
| positive regulation of multicellular organismal process | 3.79E-02 |
| negative regulation of multicellular organismal process | 4.43E-02 |

---

\* P-values for Ingenuity Canonical Pathways have Benjamini-Hochberg correction applied. P-values for GO categories have Bonferroni correction applied.

**Supplementary Table 3.** Enriched Ingenuity Canonical Pathways and GO categories for the single differentially expressed experiment-specific component.\*

| <b>Annotation</b>                                         | <b>P-Value</b> |
|-----------------------------------------------------------|----------------|
| <b><i>Ingenuity Canonical Pathways (up-regulated)</i></b> |                |
| NRF2-mediated Oxidative Stress Response                   | 2.95E-09       |
| Protein Ubiquitination Pathway                            | 7.59E-03       |
| Hypoxia Signaling in the Cardiovascular System            | 7.59E-03       |
| Inositol Metabolism                                       | 1.10E-02       |
| Polyamine Regulation in Colon Cancer                      | 1.91E-02       |
| Glucocorticoid Receptor Signaling                         | 2.09E-02       |
| <b><i>GO Categories (up-regulated)</i></b>                |                |
| response to unfolded protein                              | 1.77E-12       |
| protein folding                                           | 4.63E-09       |

\* P-values for Ingenuity Canonical Pathways have Benjamini-Hochberg correction applied. P-values for GO categories have Bonferroni correction applied.

## Supplementary Table 4.

Annotations for nineteen DE fundamental components between PTL-treated and untreated AML CD34<sup>+</sup> cells.

| Component<br>( $\Delta$ expr)             | Annotation                                                                                                               | P-Value  |
|-------------------------------------------|--------------------------------------------------------------------------------------------------------------------------|----------|
| 66<br>(+3.11)                             | <b><i>Ingenuity Canonical Pathways</i></b>                                                                               |          |
|                                           | NF- $\kappa$ B Signaling                                                                                                 | 8.51E-03 |
|                                           | T Cell Receptor Signaling                                                                                                | 8.51E-03 |
|                                           | Type I Diabetes Mellitus Signaling                                                                                       | 8.51E-03 |
|                                           | IL-6 Signaling                                                                                                           | 1.51E-02 |
|                                           | Glucocorticoid Receptor Signaling                                                                                        | 1.51E-02 |
|                                           | HMGB1 Signaling                                                                                                          | 1.62E-02 |
|                                           | Prolactin Signaling                                                                                                      | 1.62E-02 |
|                                           | LPS-stimulated MAPK Signaling                                                                                            | 1.62E-02 |
|                                           | Role of NFAT in Regulation of the Immune Response                                                                        | 1.62E-02 |
|                                           | IL-12 Signaling and Production in Macrophages                                                                            | 2.04E-02 |
|                                           | CD28 Signaling in T Helper Cells                                                                                         | 2.04E-02 |
|                                           | Lymphotoxin $\beta$ Receptor Signaling                                                                                   | 2.04E-02 |
|                                           | Type II Diabetes Mellitus Signaling                                                                                      | 2.04E-02 |
|                                           | EIF2 Signaling                                                                                                           | 2.04E-02 |
|                                           | PPAR Signaling                                                                                                           | 2.04E-02 |
|                                           | Apoptosis Signaling                                                                                                      | 2.14E-02 |
|                                           | G $\alpha$ 12/13 Signaling                                                                                               | 2.19E-02 |
|                                           | PAK Signaling                                                                                                            | 2.29E-02 |
|                                           | PTEN Signaling                                                                                                           | 2.45E-02 |
|                                           | JAK/Stat Signaling                                                                                                       | 2.45E-02 |
|                                           | Neurotrophin/TRK Signaling                                                                                               | 2.51E-02 |
|                                           | Role of PKR in Interferon Induction and Antiviral Response                                                               | 3.02E-02 |
|                                           | Agrin Interactions at Neuromuscular Junction                                                                             | 3.02E-02 |
|                                           | iCOS-iCOSL Signaling in T Helper Cells                                                                                   | 3.02E-02 |
|                                           | Cholecystokinin/Gastrin-mediated Signaling                                                                               | 3.02E-02 |
|                                           | Acute Phase Response Signaling                                                                                           | 3.16E-02 |
|                                           | Rac Signaling                                                                                                            | 3.47E-02 |
|                                           | 14-3-3-mediated Signaling                                                                                                | 3.98E-02 |
|                                           | Estrogen Receptor Signaling                                                                                              | 4.07E-02 |
|                                           | B Cell Receptor Signaling                                                                                                | 4.07E-02 |
|                                           | TGF- $\beta$ Signaling                                                                                                   | 4.07E-02 |
|                                           | Ceramide Signaling                                                                                                       | 4.27E-02 |
| Germ Cell-Sertoli Cell Junction Signaling | 4.27E-02                                                                                                                 |          |
| Androgen Signaling                        | 4.27E-02                                                                                                                 |          |
| CD27 Signaling in Lymphocytes             | 4.47E-02                                                                                                                 |          |
| PPAR $\alpha$ /RXR $\alpha$ Activation    | 4.68E-02                                                                                                                 |          |
| IL-2 Signaling                            | 4.90E-02                                                                                                                 |          |
|                                           | <b><i>GO Categories</i></b>                                                                                              |          |
|                                           | regulation of transcription, DNA-dependent                                                                               | 2.76E-06 |
|                                           | negative regulation of biological process                                                                                | 4.23E-02 |
|                                           | <b><i>GEO experiments with high expression of this component</i></b>                                                     |          |
| GSE10609                                  | the recurrent SET-NUP214 fusion as a new HOXA activation mechanism in pediatric T-ALL                                    |          |
| GSE7440                                   | Early Response and Outcome in High-Risk Childhood Acute Lymphoblastic Leukemia: A Children's Oncology Group Study        |          |
| GSE10358                                  | Discovery and validation of expression data for the Genomics of Acute Myeloid Leukemia Program at Washington University. |          |
| GSE10792                                  | Genome wide genotyping and gene expression data of childhood B-cell precursor ALL without known genetic aberrations      |          |
| GSE7757                                   | Robustness of gene expression signatures in leukemia: comparison of three distinct total RNA preparation procedures.     |          |

GSE11190 Interferon signaling and treatment outcome in chronic hepatitis C

---

|            |                                                                                                                    |          |
|------------|--------------------------------------------------------------------------------------------------------------------|----------|
| <b>362</b> | <b><i>Ingenuity Canonical Pathways</i></b>                                                                         |          |
| (+2.34)    | NRF2-mediated Oxidative Stress Response                                                                            | 1.05E-04 |
|            | Complement System                                                                                                  | 1.23E-02 |
|            | Aryl Hydrocarbon Receptor Signaling                                                                                | 1.23E-02 |
|            | Glucocorticoid Receptor Signaling                                                                                  | 2.40E-02 |
|            | Role of Pattern Recognition Receptors in Recognition of Bacteria and Viruses                                       | 2.40E-02 |
|            | <b><i>GO Categories</i></b>                                                                                        |          |
|            | response to unfolded protein                                                                                       | 1.67E-15 |
|            | protein folding                                                                                                    | 2.86E-15 |
|            | organ development                                                                                                  | 4.48E-02 |
|            | <b><i>GEO experiments with high expression of this component</i></b>                                               |          |
| GSE7307    | Human body index - transcriptional profiling                                                                       |          |
| GSE7621    | Expression data of substantia nigra from postmortem human brain of Parkinson's disease patients (PD)               |          |
| GSE10315   | Multipotent mesenchymal stromal cells: identification of pathways common to TGFβ3/BMP2-induced chondrogenesis      |          |
| GSE8977    | Bone-marrow-derived mesenchymal stem cells promote breast cancer metastasis                                        |          |
| GSE2816    | cMyb and vMyb in human monocytes                                                                                   |          |
| GSE7904    | Expression data from human breast tissue                                                                           |          |
| GSE3325    | Integrative Genomic and Proteomic Analysis of Prostate Cancer Reveals Signatures of Metastatic Progression         |          |
| GSE2109    | Expression Project for Oncology (expO)                                                                             |          |
| GSE9916    | The genomic-level expression patterns of human mononuclear cells subjected heat shock or lipopolysaccharide stress |          |
| GSE5281    | Alzheimer's disease and the normal aged brain (steph-affy-human-433773)                                            |          |
| GSE9089    | Reanalysis of GSE8884 Samples with Endothelial Samples from GSE3998.                                               |          |
| GSE8586    | Expression profiles of extremely low gestational age newborns as predictors of BPD                                 |          |
| GSE3526    | Comparison of gene expression profiles across the normal human body                                                |          |

---

|           |                                                                                                                     |          |
|-----------|---------------------------------------------------------------------------------------------------------------------|----------|
| <b>84</b> | <b><i>Ingenuity Canonical Pathways</i></b>                                                                          |          |
| (+1.53)   | N-Glycan Biosynthesis                                                                                               | 3.38E-10 |
|           | Endoplasmic Reticulum Stress Pathway                                                                                | 1.23E-04 |
|           | NRF2-mediated Oxidative Stress Response                                                                             | 1.23E-02 |
|           | Antigen Presentation Pathway                                                                                        | 1.72E-02 |
|           | Lipid Antigen Presentation by CD1                                                                                   | 3.03E-02 |
|           | Aminosugars Metabolism                                                                                              | 3.16E-02 |
|           | Starch and Sucrose Metabolism                                                                                       | 4.88E-02 |
|           | <b><i>GO Categories</i></b>                                                                                         |          |
|           | protein folding                                                                                                     | 4.92E-10 |
|           | protein amino acid N-linked glycosylation                                                                           | 2.46E-07 |
|           | secretion                                                                                                           | 6.40E-05 |
|           | intracellular protein transport                                                                                     | 2.26E-04 |
|           | cell redox homeostasis                                                                                              | 2.90E-04 |
|           | ER to Golgi vesicle-mediated transport                                                                              | 4.92E-04 |
|           | protein retention in ER lumen                                                                                       | 3.64E-03 |
|           | signal peptide processing                                                                                           | 8.37E-03 |
|           | response to endoplasmic reticulum stress                                                                            | 9.85E-03 |
|           | ER-nuclear signaling pathway                                                                                        | 4.73E-02 |
|           | <b><i>GEO experiments with high expression of this component</i></b>                                                |          |
| GSE10315  | Multipotent mesenchymal stromal cells: identification of pathways common to TGFβ3/BMP2-induced chondrogenesis       |          |
| GSE6283   | Specific transcriptional changes in human fetus with autosomal trisomies                                            |          |
| GSE6400   | Cultured A549 lung cancer cells treated with actinomycin D and saphyrin PCI-2050                                    |          |
| GSE6241   | The effects of Serum Amyloid A on gene expression profile in HUVECs                                                 |          |
| GSE7846   | Differentially expressed genes in HEECs of eutopic endometrium of patients with endometriosis compared with control |          |
| GSE10444  | gene expression levels in long-term cultures of human dental pulp stem cells                                        |          |

|          |                                                                                                                          |
|----------|--------------------------------------------------------------------------------------------------------------------------|
| GSE2109  | Expression Project for Oncology (expO)                                                                                   |
| GSE9452  | Definition of an ulcerative colitis preinflammatory state                                                                |
| GSE9077  | Expression profiles of immortal lung fibroblasts                                                                         |
| GSE9647  | Comparative transcriptomic profiling of unstimulated and inflamed HUVEC exposed to apple procyanidin oligomers           |
| GSE9832  | Reprogramming of human somatic cells to pluripotency with defined factors                                                |
| GSE8742  | The Induction of Senescence-Like Growth Arrest by Diterpene Esters in Solid Tumor Cells                                  |
| GSE7307  | Human body index - transcriptional profiling                                                                             |
| GSE4183  | Inflammation, adenoma and cancer: objective classification of colon biopsy specimens with gene expression signature      |
| GSE6532  | Definition of clinically distinct molecular subtypes in estrogen receptor positive breast carcinomas using genomic grade |
| GSE10575 | Migratory chondrogenic progenitor cells from repair tissue during the later stages of human osteoarthritis               |
| GSE7127  | 63 Melanoma cell lines                                                                                                   |
| GSE8049  | Expression analyses of glioblastoma derived neurosphere cultures                                                         |
| GSE8332  | Death receptor O-glycosylation controls tumor-cell sensitivity to the proapoptotic ligand Apo2L/TRAIL                    |

---

|           |                                                             |          |
|-----------|-------------------------------------------------------------|----------|
| <b>73</b> | <b><i>Ingenuity Canonical Pathways</i></b>                  |          |
| (+1.38)   | Metabolism of Xenobiotics by Cytochrome P450                | 7.94E-13 |
|           | Xenobiotic Metabolism Signaling                             | 3.98E-12 |
|           | NRF2-mediated Oxidative Stress Response                     | 6.92E-10 |
|           | Glutathione Metabolism                                      | 5.75E-09 |
|           | Pentose and Glucuronate Interconversions                    | 3.39E-08 |
|           | Arachidonic Acid Metabolism                                 | 3.02E-07 |
|           | LPS/IL-1 Mediated Inhibition of RXR Function                | 7.08E-06 |
|           | Starch and Sucrose Metabolism                               | 1.45E-05 |
|           | PXR/RXR Activation                                          | 7.08E-05 |
|           | Bile Acid Biosynthesis                                      | 7.08E-05 |
|           | Aryl Hydrocarbon Receptor Signaling                         | 9.12E-05 |
|           | Pyruvate Metabolism                                         | 1.00E-04 |
|           | Retinol Metabolism                                          | 1.45E-04 |
|           | Androgen and Estrogen Metabolism                            | 6.76E-04 |
|           | Ascorbate and Aldarate Metabolism                           | 6.92E-04 |
|           | Chondroitin Sulfate Biosynthesis                            | 8.91E-04 |
|           | Cysteine Metabolism                                         | 9.33E-04 |
|           | Tryptophan Metabolism                                       | 1.58E-03 |
|           | Glycolysis/Gluconeogenesis                                  | 2.14E-03 |
|           | Pentose Phosphate Pathway                                   | 2.63E-03 |
|           | Glycerolipid Metabolism                                     | 2.63E-03 |
|           | Sulfur Metabolism                                           | 3.09E-03 |
|           | Fatty Acid Metabolism                                       | 3.89E-03 |
|           | C21-Steroid Hormone Metabolism                              | 5.89E-03 |
|           | Keratan Sulfate Biosynthesis                                | 7.59E-03 |
|           | Fructose and Mannose Metabolism                             | 9.33E-03 |
|           | FXR/RXR Activation                                          | 1.07E-02 |
|           | Hepatic Cholestasis                                         | 1.10E-02 |
|           | Butanoate Metabolism                                        | 1.66E-02 |
|           | IL-10 Signaling                                             | 1.70E-02 |
|           | Eicosanoid Signaling                                        | 1.86E-02 |
|           | Propanoate Metabolism                                       | 2.00E-02 |
|           | Linoleic Acid Metabolism                                    | 2.19E-02 |
|           | MIF Regulation of Innate Immunity                           | 2.82E-02 |
|           | Glutamate Metabolism                                        | 2.82E-02 |
|           | Altered T Cell and B Cell Signaling in Rheumatoid Arthritis | 2.82E-02 |
|           | Arginine and Proline Metabolism                             | 3.16E-02 |
|           | Ovarian Cancer Signaling                                    | 3.24E-02 |
|           | TR/RXR Activation                                           | 4.68E-02 |
|           | Galactose Metabolism                                        | 4.79E-02 |

***GO Categories***

|            |                                                                                                                          |          |
|------------|--------------------------------------------------------------------------------------------------------------------------|----------|
|            | icosanoid metabolic process                                                                                              | 9.35E-05 |
|            | pyridine nucleotide metabolic process                                                                                    | 1.53E-03 |
|            | generation of precursor metabolites and energy                                                                           | 8.86E-03 |
|            | nicotinamide metabolic process                                                                                           | 1.48E-02 |
|            | response to stimulus                                                                                                     | 2.46E-02 |
|            | steroid metabolic process                                                                                                | 3.15E-02 |
|            | <b><i>GEO experiments with high expression of this component</i></b>                                                     |          |
| GSE8961    | Identification of human metapneumovirus-induced gene networks in airway epithelial cells by microarray analysis          |          |
| GSE3202    | MK886 treatment of H720 non-small cell lung cancer cell line                                                             |          |
| GSE6013    | Gene expression in asbestos exposed lung cells                                                                           |          |
| GSE6960    | Synthesis and Anticancer Properties of Water-Soluble Zinc Ionophores 1                                                   |          |
| GSE6962    | Synthesis and Anticancer Properties of Water-Soluble Zinc Ionophores 2                                                   |          |
| GSE6400    | Cultured A549 lung cancer cells treated with actinomycin D and sapphyrin PCI-2050                                        |          |
| GSE9008    | Resveratrol action on A549 lung cancer cells                                                                             |          |
| GSE5816    | A Genome-wide Screen for Hypermethylated Genes in Lung Cancer                                                            |          |
| GSE2109    | Expression Project for Oncology (expO)                                                                                   |          |
| GSE7964    | HDAC-42 modulates acid-induced gene expression in human SEG-1 esophageal adenocarcinoma cells                            |          |
| GSE8527    | Analysis of the in vitro transcriptional response of human pharyngeal epithelial cells to adherent pneumococci           |          |
| <b>406</b> | <b><i>Ingenuity Canonical Pathways</i></b>                                                                               |          |
| (+1.24)    | Glucocorticoid Receptor Signaling                                                                                        | 6.17E-03 |
|            | <b><i>GO Categories</i></b>                                                                                              |          |
|            | regulation of biological process                                                                                         | 9.85E-03 |
|            | <b><i>GEO experiments with high expression of this component</i></b>                                                     |          |
| GSE10358   | Discovery and validation of expression data for the Genomics of Acute Myeloid Leukemia Program at Washington University. |          |
| GSE10609   | the recurrent SET-NUP214 fusion as a new HOXA activation mechanism in pediatric T-ALL                                    |          |
| GSE7440    | Early Response and Outcome in High-Risk Childhood Acute Lymphoblastic Leukemia: A Children's Oncology Group Study        |          |
| GSE9089    | Reanalysis of GSE8884 Samples with Endothelial Samples from GSE3998.                                                     |          |
| GSE8565    | Argyrisin A is a p27 stabilizing drug with potent antiproliferative activity in vivo                                     |          |
| GSE8717    | Expression data from Human MPNST cancer cells infected with G207 and oncolytic HSV                                       |          |
| GSE7757    | Robustness of gene expression signatures in leukemia: comparison of three distinct total RNA preparation procedures.     |          |
| GSE9150    | Primary nasal epithelium exposed to house dust mite extract shows activated expression in allergics                      |          |
| GSE7845    | Proinflammatory Responses of Human Airway Cells to Ricin Involve Stress-Activated Protein Kinases and NF-κB              |          |
| GSE9090    | Reanalysis of GSE8884 Samples with Stromal Samples from GSE3998.                                                         |          |
| GSE8977    | Bone-marrow-derived mesenchymal stem cells promote breast cancer metastasis                                              |          |
| GSE6013    | Gene expression in asbestos exposed lung cells                                                                           |          |
| GSE10792   | Genome wide genotyping and gene expression data of childhood B-cell precursor ALL without known genetic aberrations      |          |
| GSE10021   | mRNA expression profiles in human cell lines                                                                             |          |
| GSE6338    | Gene expression analysis of Peripheral T-cell Lymphoma/Unspecified                                                       |          |
| GSE7307    | Human body index - transcriptional profiling                                                                             |          |
| GSE9091    | Reanalysis of GSE8884 Samples with Leukocyte Samples from GSE3284.                                                       |          |
| GSE8884    | Expression data from human embryonic stem cells, early stage embryoid bodies, and hES-derived blast cells.               |          |
| GSE9086    | Reanalysis of GSE8884 Samples with Breast Epithelial Samples from GSE3744.                                               |          |
| <b>308</b> | <b><i>Ingenuity Canonical Pathways</i></b>                                                                               |          |
| (+0.71)    | Complement System                                                                                                        | 1.06E-02 |
|            | <b><i>GO Categories</i></b>                                                                                              |          |
|            | immune response                                                                                                          | 2.36E-04 |
|            | humoral immune response                                                                                                  | 1.48E-02 |
|            | response to external stimulus                                                                                            | 2.95E-02 |
|            | response to stress                                                                                                       | 3.35E-02 |
|            | <b><i>GEO experiments with high expression of this component</i></b>                                                     |          |

GSE8507 Neutrophil and PBMC gene expression data from Job's Syndrome  
 GSE6338 Gene expression analysis of Peripheral T-cell Lymphoma/Unspecified  
 GSE11190 Interferon signaling and treatment outcome in chronic hepatitis C  
 GSE7874 Effects of EPO and EST on erythroid maturation  
 GSE9894 Specific plasma membrane protein phenotype of culture-amplified and native human bone marrow mesenchymal stem cells  
 GSE6269 Gene expression patterns in blood leukocytes discriminate patients with acute infections  
 GSE10792 Genome wide genotyping and gene expression data of childhood B-cell precursor ALL without known genetic aberrations  
 GSE10358 Discovery and validation of expression data for the Genomics of Acute Myeloid Leukemia Program at Washington University.  
 GSE7757 Robustness of gene expression signatures in leukemia: comparison of three distinct total RNA preparation procedures.

---

**242** *Ingenuity Canonical Pathways*  
 (+0.71) Pentose Phosphate Pathway 8.14E-03

**GO Categories**  
 spermatogenesis 8.37E-13  
 single fertilization 1.28E-05  
 spermatid development 2.81E-03

**GEO experiments with high expression of this component**  
 GSE6872 Spermatozoal RNA Profiles (U133 Plus 2.0 Array)  
 GSE8507 Neutrophil and PBMC gene expression data from Job's Syndrome  
 GSE5850 Microarray analysis of NL and PCOS oocytes  
 GSE7307 Human body index - transcriptional profiling  
 GSE5816 A Genome-wide Screen for Hypermethylated Genes in Lung Cancer  
 GSE7364 Gene-resolution analysis of DNA copy number variation using oligonucleotide expression microarrays  
 GSE2816 cMyb and vMyb in human monocytes  
 GSE2109 Expression Project for Oncology (expO)  
 GSE6728 Expression data for NMD inhibition in Mantle Cell Lymphoma  
 GSE3526 Comparison of gene expression profiles across the normal human body  
 GSE7451 Primary Sjogren's syndrome and control whole saliva  
 GSE7808 Region specific gene expression profiling along the human epididymis  
 GSE8658 PPARg regulated gene expression in human dendritic cells

---

**192** *Ingenuity Canonical Pathways*  
 (+0.67) none

**GO Categories**  
 serine family amino acid biosynthetic process 2.51E-02

**GEO experiments with high expression of this component**  
 GSE9819 Comparisons of Affymetrix Whole-Transcript Human Gene 1.0 ST array with standard 3' expression arrays  
 GSE7708 Suppression of androgen receptor mediated gene expression by a sequence-specific DNA binding polyamide  
 GSE8565 Argyrin A is a p27 stabilizing drug with potent antiproliferative activity in vivo  
 GSE9890 Expression profile of 5 ovarian tumour samples (two different cell types from each sample profiles)  
 GSE9264 Kaposi's Sarcoma-associated Herpesvirus Encodes an Ortholog of miR-155  
 GSE7554 Identification of Cellular Genes Targeted by KSHV-Encoded MicroRNAs  
 GSE8438 IP Staufen1  
 GSE5816 A Genome-wide Screen for Hypermethylated Genes in Lung Cancer  
 GSE7896 S1P mediates key targets associated with survival, proliferation and pluripotency in human embryonic stem cells  
 GSE8640 TFAP2C regulates multiple pathways of estrogen signaling  
 GSE8702 Longitudinal Analysis of Progression to Androgen Independence  
 GSE7213 Comparative analysis of cellular mRNA incorporation into MLV and HIV1 virus-like particles  
 GSE3202 MK886 treatment of H720 non-small cell lung cancer cell line  
 GSE6629 Domain-Wide Regulation of Gene Expression in the Human Genome  
 GSE8437 IP Staufen2  
 GSE9089 Reanalysis of GSE8884 Samples with Endothelial Samples from GSE3998.

---

**151** *Ingenuity Canonical Pathways*



|            |                                                                                                                   |          |
|------------|-------------------------------------------------------------------------------------------------------------------|----------|
| (-0.54)    | none                                                                                                              |          |
|            | <b>GO Categories</b>                                                                                              |          |
|            | cell differentiation                                                                                              | 2.76E-03 |
|            | epidermis development                                                                                             | 4.23E-03 |
|            | epidermal cell differentiation                                                                                    | 1.03E-02 |
|            | tissue morphogenesis                                                                                              | 1.87E-02 |
|            | epidermis morphogenesis                                                                                           | 2.02E-02 |
|            | <b>GEO experiments with high expression of this component</b>                                                     |          |
| GSE10700   | Time course of NHBE cells exposed to whole cigarette smoke                                                        |          |
| GSE10718   | Time course of NHBE cells exposed to whole cigarette smoke (full flavor)                                          |          |
| GSE9951    | Transcriptome analyses in normal prostate epithelial cells following exposure to low-dose cadmium                 |          |
| GSE6075    | E6 in HOK/Bmi-1 cells                                                                                             |          |
| GSE4824    | Analysis of lung cancer cell lines                                                                                |          |
| GSE6283    | Specific transcriptional changes in human fetus with autosomal trisomies                                          |          |
| GSE6885    | Transformed Human Breast Epithelial Cell Types vs. Normal Cell-of-Origin                                          |          |
| <b>79</b>  | <b>Ingenuity Canonical Pathways</b>                                                                               |          |
| (-0.61)    | none                                                                                                              |          |
|            | <b>GO Categories</b>                                                                                              |          |
|            | system development                                                                                                | 7.88E-03 |
|            | organ development                                                                                                 | 1.72E-02 |
|            | <b>GEO experiments with high expression of this component</b>                                                     |          |
| GSE7307    | Human body index - transcriptional profiling                                                                      |          |
| GSE2109    | Expression Project for Oncology (expO)                                                                            |          |
| GSE3526    | Comparison of gene expression profiles across the normal human body                                               |          |
| GSE7808    | Region specific gene expression profiling along the human epididymis                                              |          |
| GSE7305    | Human endometriosis vs normal endometrium study - transcriptional profiling                                       |          |
| <b>205</b> | <b>Ingenuity Canonical Pathways</b>                                                                               |          |
| (-0.66)    | none                                                                                                              |          |
|            | <b>GO Categories</b>                                                                                              |          |
|            | none                                                                                                              |          |
|            | <b>GEO experiments with high expression of this component</b>                                                     |          |
| GSE10270   | Bisphenol A induces a profile of tumor aggressiveness in high-risk cells of breast cancer patients                |          |
| GSE3678    | PTC versus paired normal thyroid tissue                                                                           |          |
| GSE11166   | Local regulation and clinical impact of complement gene expression in deceased and living donor kidney allografts |          |
| GSE4217    | Spheroid Formation and Recovery of Human Foreskin Fibroblasts at Ambient Temperature                              |          |
| GSE9757    | Response to estradiol-ERalpha                                                                                     |          |
| GSE4218    | Spheroid Formation and Recovery of Human T98G Glioma Cells at Ambient Temperature                                 |          |
| GSE9759    | Response to estradiol-ERbeta and estradiol-ERbeta ERE binding defective mutant                                    |          |
| GSE6551    | Expression data from intracranial arteries and intracranial aneurysms                                             |          |
| GSE7307    | Human body index - transcriptional profiling                                                                      |          |
| GSE6369    | Prostate Adenocarcinoma Progression                                                                               |          |
| GSE9890    | Expression profile of 5 ovarian tumour samples (two different cell types from each sample profiles)               |          |
| GSE3526    | Comparison of gene expression profiles across the normal human body                                               |          |
| GSE7538    | Treatment of primary acute myelogenous leukemia (AML) specimens with parthenolide (PTL)                           |          |
| <b>314</b> | <b>Ingenuity Canonical Pathways</b>                                                                               |          |
| (-0.70)    | none                                                                                                              |          |
|            | <b>GO Categories</b>                                                                                              |          |
|            | none                                                                                                              |          |
|            | <b>GEO experiments with high expression of this component</b>                                                     |          |
| GSE6791    | Gene Expression Profiles of HPV-Positive and -Negative Head/Neck and Cervical Cancers                             |          |

GSE7392 Molecular Evidence of Injury and Inflammation in Normal and Fibrotic Renal Allografts One Year Post-Transplant  
 GSE2328 Application of genome-wide expression analysis to human health & disease  
 GSE7807 Leukotriene D4 induces gene expression in human monocytes through cysteinyl leukotriene type I receptor.  
 GSE6573 Dysregulation of the circulating and tissue-based renin-angiotensin system in preeclampsia  
 GSE7158 Genome Wide Gene Expression Study of Circulating Monocytes in human with extremely high vs. low bone mass  
 GSE6092 IFN-gamma alters the response of Borrelia burgdorferi-activated endothelium to favor chronic inflammation  
 GSE6791 Gene Expression Profiles of HPV-Positive and -Negative Head/Neck and Cervical Cancers  
 GSE7392 Molecular Evidence of Injury and Inflammation in Normal and Fibrotic Renal Allografts One Year Post-Transplant

---

**163** *Ingenuity Canonical Pathways*  
 (-0.81) serine family amino acid biosynthetic process 4.63E-02

**GO Categories**

none

**GEO experiments with high expression of this component**

GSE7708 Suppression of androgen receptor mediated gene expression by a sequence-specific DNA binding polyamide  
 GSE9819 Comparisons of Affymetrix Whole-Transcript Human Gene 1.0 ST array with standard 3' expression arrays  
 GSE9361 Functional interaction between a PIP2 novel polyA polymerase and type 1 PIPK1alpha  
 GSE8437 IP Staufen2  
 GSE8438 IP Staufen1  
 GSE10311 Systematic Assessment of Human Osteoblast Transcriptome in Resting and Induced Primary Cells  
 GSE5486 Using GINI2 to identify novel mutations in candidate tumor suppressor genes in colon cancer cells  
 GSE8596 Expression profiles of pediatric solid tumor cell lines  
 GSE7213 Comparative analysis of cellular mRNA incorporation into MLV and HIV1 virus-like particles  
 GSE8565 Argyrin A is a p27 stabilizing drug with potent antiproliferative activity in vivo  
 GSE10946 Gene expression microarray profiles of cumulus cells in lean and overweight-obese polycystic ovary syndrome patients  
 GSE6629 Domain-Wide Regulation of Gene Expression in the Human Genome  
 GSE2555 HCaRG-9 vs NEO-1  
 GSE5816 A Genome-wide Screen for Hypermethylated Genes in Lung Cancer  
 GSE6890 Transcriptome maps of six different human cell lines  
 GSE10021 mRNA expression profiles in human cell lines  
 GSE8702 Longitudinal Analysis of Progression to Androgen Independence  
 GSE6532 Definition of clinically distinct molecular subtypes in estrogen receptor positive breast carcinomas using genomic grade  
 GSE9974 The effect of the HDAC inhibitor OSU-HDAC42 on gene expression in esophageal tissues and adenocarcinoma cells I  
 GSE8066 Dickkopf-1 is down-regulated by MYCN and inhibits neuroblastoma cell proliferation  
 GSE6013 Gene expression in asbestos exposed lung cells

---

**203** *Ingenuity Canonical Pathways*  
 -0.84 Metabolism of Xenobiotics by Cytochrome P450 1.86E-06  
 LPS/IL-1 Mediated Inhibition of RXR Function 7.59E-05  
 Aryl Hydrocarbon Receptor Signaling 1.78E-03  
 Glutathione Metabolism 1.78E-03  
 Fatty Acid Metabolism 3.09E-03  
 Arginine and Proline Metabolism 6.03E-03  
 Ascorbate and Aldarate Metabolism 1.10E-02  
 PXR/RXR Activation 2.40E-02  
 NRF2-mediated Oxidative Stress Response 2.40E-02  
 Xenobiotic Metabolism Signaling 3.09E-02  
 Bladder Cancer Signaling 4.47E-02  
 Bile Acid Biosynthesis 4.57E-02

**GO Categories**

none

**GEO experiments with high expression of this component**

GSE8671 Transcriptome profile of human colorectal adenomas.

GSE2109 Expression Project for Oncology (expO)  
 GSE6532 Definition of clinically distinct molecular subtypes in estrogen receptor positive breast carcinomas using genomic grade  
 GSE7476 Analysis of clinical bladder cancer classification according to microarray expression profiles  
 GSE9452 Definition of an ulcerative colitis preinflammatory state

---

**359** ***Ingenuity Canonical Pathways***  
 (-1.02) none

**GO Categories**  
 immune response 6.40E-05

**GEO experiments with high expression of this component**  
 Discovery and validation of expression data for the Genomics of Acute Myeloid Leukemia Program at Washington  
 GSE10358 University.  
 AML1-ETO transduced human cord blood cells, CD34 selected, compared to normal cord blood cells, CD34  
 GSE8023 selected  
 Robustness of gene expression signatures in leukemia: comparison of three distinct total RNA preparation  
 GSE7757 procedures.

---

**43** ***Ingenuity Canonical Pathways***  
 (-1.19)

|                                                                                |          |
|--------------------------------------------------------------------------------|----------|
| T Cell Receptor Signaling                                                      | 1.26E-13 |
| iCOS-iCOSL Signaling in T Helper Cells                                         | 2.00E-12 |
| Calcium-induced T Lymphocyte Apoptosis                                         | 1.20E-09 |
| CCR5 Signaling in Macrophages                                                  | 1.00E-08 |
| CD28 Signaling in T Helper Cells                                               | 1.38E-08 |
| CTLA4 Signaling in Cytotoxic T Lymphocytes                                     | 1.05E-07 |
| Role of NFAT in Regulation of the Immune Response                              | 1.55E-07 |
| Primary Immunodeficiency Signaling                                             | 6.92E-07 |
| Systemic Lupus Erythematosus Signaling                                         | 3.89E-06 |
| Cytotoxic T Lymphocyte-mediated Apoptosis of Target Cells                      | 4.37E-06 |
| Phospholipase C Signaling                                                      | 6.03E-06 |
| Cdc42 Signaling                                                                | 6.03E-05 |
| Communication between Innate and Adaptive Immune Cells                         | 1.58E-04 |
| NF-κB Activation by Viruses                                                    | 2.63E-04 |
| Natural Killer Cell Signaling                                                  | 2.63E-04 |
| Type I Diabetes Mellitus Signaling                                             | 2.63E-04 |
| NF-κB Signaling                                                                | 4.07E-04 |
| T Helper Cell Differentiation                                                  | 5.25E-04 |
| Allograft Rejection Signaling                                                  | 4.47E-03 |
| Autoimmune Thyroid Disease Signaling                                           | 5.50E-03 |
| Lipid Antigen Presentation by CD1                                              | 8.13E-03 |
| Melatonin Signaling                                                            | 1.17E-02 |
| BMP signaling pathway                                                          | 1.45E-02 |
| Altered T Cell and B Cell Signaling in Rheumatoid Arthritis                    | 1.48E-02 |
| Molecular Mechanisms of Cancer                                                 | 1.55E-02 |
| Role of Macrophages, Fibroblasts and Endothelial Cells in Rheumatoid Arthritis | 1.91E-02 |
| Factors Promoting Cardiogenesis in Vertebrates                                 | 2.09E-02 |
| β-Adrenergic Signaling                                                         | 2.63E-02 |
| Crosstalk between Dendritic Cells and Natural Killer Cells                     | 2.63E-02 |
| IL-15 Signaling                                                                | 3.89E-02 |
| Cholecystokinin/Gastrin-mediated Signaling                                     | 3.98E-02 |
| Thrombin Signaling                                                             | 4.17E-02 |
| Dendritic Cell Maturation                                                      | 4.17E-02 |
| Synaptic Long Term Potentiation                                                | 4.37E-02 |
| Renin-Angiotensin Signaling                                                    | 4.37E-02 |
| Thyroid Cancer Signaling                                                       | 4.37E-02 |
| Glucocorticoid Receptor Signaling                                              | 4.37E-02 |
| IL-12 Signaling and Production in Macrophages                                  | 4.37E-02 |
| Prolactin Signaling                                                            | 4.37E-02 |
| Corticotropin Releasing Hormone Signaling                                      | 4.37E-02 |

|                                                                           |          |
|---------------------------------------------------------------------------|----------|
| Graft-versus-Host Disease Signaling                                       | 4.37E-02 |
| LPS-stimulated MAPK Signaling                                             | 4.37E-02 |
| FLT3 Signaling in Hematopoietic Progenitor Cells                          | 4.37E-02 |
| CCR3 Signaling in Eosinophils                                             | 4.37E-02 |
| Acute Myeloid Leukemia Signaling                                          | 4.57E-02 |
| Chemokine Signaling                                                       | 4.57E-02 |
| Androgen Signaling                                                        | 4.57E-02 |
| Role of Osteoblasts, Osteoclasts and Chondrocytes in Rheumatoid Arthritis | 4.90E-02 |

**GO Categories**

|                                                  |          |
|--------------------------------------------------|----------|
| immune response                                  | 1.62E-19 |
| cell surface receptor linked signal transduction | 2.12E-08 |
| cellular defense response                        | 4.14E-07 |
| multicellular organismal process                 | 7.88E-05 |
| regulation of T cell activation                  | 2.51E-04 |
| T cell differentiation                           | 3.54E-04 |
| signal transduction                              | 1.77E-03 |
| lymphocyte activation                            | 2.81E-03 |
| positive regulation of T cell activation         | 6.40E-03 |
| regulation of multicellular organismal process   | 1.28E-02 |
| regulation of programmed cell death              | 4.48E-02 |

**GEO experiments with high expression of this component**

|          |                                                                                                                         |
|----------|-------------------------------------------------------------------------------------------------------------------------|
| GSE6088  | Imprints of atherosclerosis are present in circulating T cells of patients with Familial Hypercholesterolemia           |
| GSE9927  | Chronic CD4+ T cell Activation & Depletion in HIV-1 Infection: Type I Interferon-Mediated Disruption of T Cell Dynamics |
| GSE6338  | Gene expression analysis of Peripheral T-cell Lymphoma/Unspecified                                                      |
| GSE7345  | Germline NRAS mutation causes a novel human autoimmune lymphoproliferative syndrome                                     |
| GSE6743  | 1,25 (OH) <sub>2</sub> vitamin D <sub>3</sub> induces expression of CCR10 and other genes                               |
| GSE6269  | Gene expression patterns in blood leukocytes discriminate patients with acute infections                                |
| GSE6566  | Strength of T cell stimulation                                                                                          |
| GSE7307  | Human body index - transcriptional profiling                                                                            |
| GSE10437 | Dynamic regulation of nucleosome positioning in the human genome                                                        |
| GSE11190 | Interferon signaling and treatment outcome in chronic hepatitis C                                                       |
| GSE8121  | Pediatric septic shock                                                                                                  |
| GSE9692  | Validation of Genome-wide Expression patterns in Pediatric Septic Shock                                                 |
| GSE3077  | Dilution series comparison of Affymetrix and Illumina Expression Platforms                                              |

---

**208** **Ingenuity Canonical Pathways**  
(-1.73) none

**GO Categories**

none

**GEO experiments with high expression of this component**

|          |                                                                                                                                                                                                                             |
|----------|-----------------------------------------------------------------------------------------------------------------------------------------------------------------------------------------------------------------------------|
| GSE2109  | Expression Project for Oncology (expO)                                                                                                                                                                                      |
| GSE10609 | the recurrent SET-NUP214 fusion as a new HOXA activation mechanism in pediatric T-ALL                                                                                                                                       |
| GSE9891  | Expression profile of 285 ovarian tumour samples                                                                                                                                                                            |
| GSE6532  | Definition of clinically distinct molecular subtypes in estrogen receptor positive breast carcinomas using genomic grade                                                                                                    |
| GSE9151  | Allergen induced gene expression of airway epithelial cells shows a possible role for TNF- $\alpha$<br>Robustness of gene expression signatures in leukemia: comparison of three distinct total RNA preparation procedures. |
| GSE7757  | Prednisolone treated childhood ALL samples                                                                                                                                                                                  |
| GSE2677  | Human body index - transcriptional profiling                                                                                                                                                                                |
| GSE7307  | Human body index - transcriptional profiling                                                                                                                                                                                |
| GSE3526  | Comparison of gene expression profiles across the normal human body                                                                                                                                                         |

---

**62** **Ingenuity Canonical Pathways**  
(-1.95)

|                                         |          |
|-----------------------------------------|----------|
| EIF2 Signaling                          | 1.91E-10 |
| Regulation of eIF4 and p70S6K Signaling | 3.89E-08 |
| mTOR Signaling                          | 3.72E-04 |

**GO Categories**

|                                        |          |
|----------------------------------------|----------|
| translation                            | <1E-30   |
| translational elongation               | 3.99E-05 |
| regulation of translational initiation | 4.18E-04 |
| ribonucleoprotein complex biogenesis   | 3.64E-03 |

**GEO experiments with high expression of this component**

|          |                                                                                                                          |
|----------|--------------------------------------------------------------------------------------------------------------------------|
| GSE10358 | Discovery and validation of expression data for the Genomics of Acute Myeloid Leukemia Program at Washington University. |
| GSE10609 | the recurrent SET-NUP214 fusion as a new HOXA activation mechanism in pediatric T-ALL                                    |
| GSE2109  | Expression Project for Oncology (expO)                                                                                   |
| GSE10792 | Genome wide genotyping and gene expression data of childhood B-cell precursor ALL without known genetic aberrations      |
| GSE7307  | Human body index - transcriptional profiling                                                                             |
| GSE6338  | Gene expression analysis of Peripheral T-cell Lymphoma/Unspecified                                                       |
| GSE9891  | Expression profile of 285 ovarian tumour samples                                                                         |
| GSE9091  | Reanalysis of GSE8884 Samples with Leukocyte Samples from GSE3284.                                                       |
| GSE8884  | Expression data from human embryonic stem cells, early stage embryoid bodies, and hES-derived blast cells.               |
| GSE9086  | Reanalysis of GSE8884 Samples with Breast Epithelial Samples from GSE3744.                                               |
| GSE9090  | Reanalysis of GSE8884 Samples with Stromal Samples from GSE3998.                                                         |

---

**101** *Ingenuity Canonical Pathways*  
(-2.68) none

**GO Categories**

|                                |          |
|--------------------------------|----------|
| defense response               | 2.22E-03 |
| icosanoid biosynthetic process | 5.91E-03 |
| immune system process          | 8.37E-03 |

**GEO experiments with high expression of this component**

|          |                                                                                                                          |
|----------|--------------------------------------------------------------------------------------------------------------------------|
| GSE10358 | Discovery and validation of expression data for the Genomics of Acute Myeloid Leukemia Program at Washington University. |
| GSE7757  | Robustness of gene expression signatures in leukemia: comparison of three distinct total RNA preparation procedures.     |
| GSE8023  | AML1-ETO transduced human cord blood cells, CD34 selected, compared to normal cord blood cells, CD34 selected            |

---

\* P-values for Ingenuity Canonical Pathways have Benjamini-Hochberg correction applied. P-values for GO categories have Bonferroni correction applied.
